# Supplementary material
Source: publisher figshare collection journal article supplement (https://sage.figshare.com/ndownloader/files/23681479)
Supplement: Supplementary file 1 [file 23681479]

| Studies                | Selection                                |                                     |                           | Comparability                                                            |                        |                                          |                       | Outcome                                                    |                                  | Score |
|------------------------|------------------------------------------|-------------------------------------|---------------------------|--------------------------------------------------------------------------|------------------------|------------------------------------------|-----------------------|------------------------------------------------------------|----------------------------------|-------|
|                        | Representativeness of the Exposed Cohort | Selection of the Non-Exposed Cohort | Ascertainment of Exposure | Demonstration That Outcome of Interest Was Not Present at Start of Study | Study controls for age | Study controls for any additional factor | Assessment of outcome | Was follow-up long enough for outcomes to occur(>=6months) | Adequacy of follow up of cohorts |       |
| Harpole, et al. (1990) | 0                                        | 1                                   | 1                         | 1                                                                        | 1                      | 1                                        | 1                     | 0                                                          | 1                                | 7     |
| Quick, et al. (2013).  | 0                                        | 1                                   | 1                         | 1                                                                        | 0                      | 1                                        | 1                     | 0                                                          | 0                                | 5     |
| Crouch, et al. (2015). | 0                                        | 0                                   | 1                         | 1                                                                        | 1                      | 1                                        | 1                     | 0                                                          | 1                                | 6     |
| Kempny, et al. (2012). | 0                                        | 1                                   | 1                         | 1                                                                        | 0                      | 0                                        | 1                     | 0                                                          | 0                                | 4     |
| Ayhan, et al. (2014).  | 0                                        | 1                                   | 1                         | 1                                                                        | 1                      | 1                                        | 1                     | 1                                                          | 0                                | 7     |
| Keyl, et al. (2016).   | 0                                        | 1                                   | 1                         | 1                                                                        | 0                      | 1                                        | 1                     | 0                                                          | 1                                | 6     |
| Musa, et al. (2016).   | 0                                        | 1                                   | 1                         | 1                                                                        | 0                      | 1                                        | 1                     | 1                                                          | 1                                | 7     |
| Zhao, et al. (2011).   | 0                                        | 1                                   | 1                         | 1                                                                        | 1                      | 1                                        | 1                     | 0                                                          | 1                                | 7     |
